# Supplementary material
Source: PubMed Central journal article supplement (PMC3279935)

Appendix.

**Figure 1\*:** Length SDS and BMI SDS in infants followed prospectively for at least 6 months from entry to IPPN registry while on a constant feeding modality. Data are given as mean  $\pm$  2 SEM from the following numbers of patients at 0, 6, 12, 18 and 24 months: feeding on demand: 34, 34, 15, 15, 9; NG tube feeding: 40, 40, 30, 15, 12; gastrostomy feeding: 17, 17, 10, 8, 2.

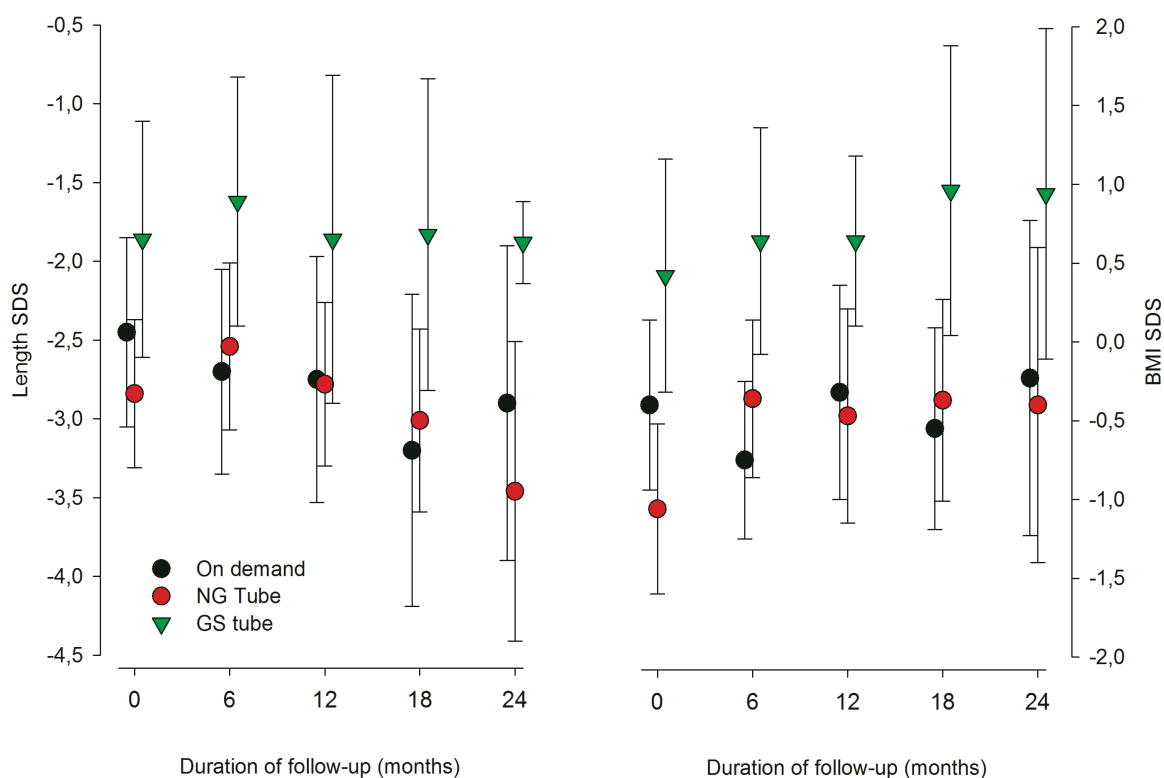

**Figure 2\*:** Length SDS in infants followed prospectively for at least 6 months from entry to IPPN registry, stratified by type of PD fluid utilized. Black circles denote conventional acidic, high-GDP solution, red triangles neutral-pH, low-GDP fluid. Data are given as mean  $\pm$  2 SEM. Numbers of patients receiving either fluid at each time point are indicated.

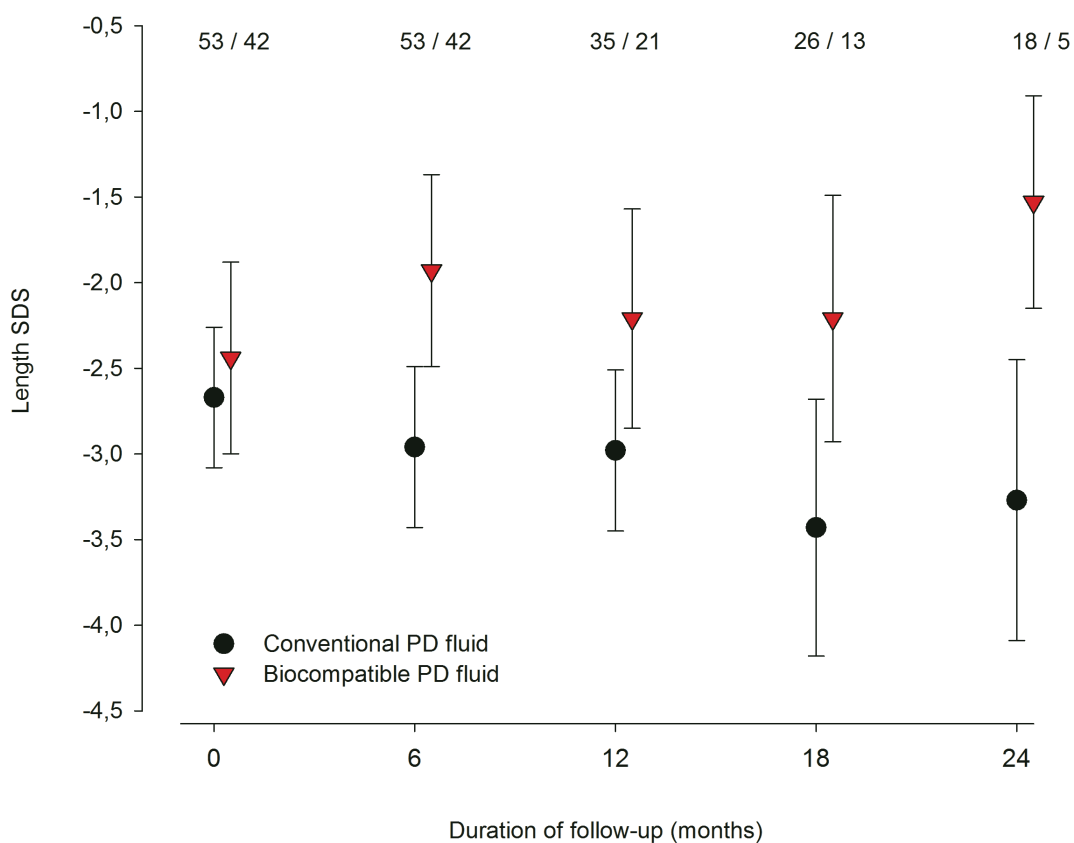

**Figure 3\*:** Length SDS in 8 infants receiving recombinant growth hormone treatment for at least 6 months while followed in the IPPN registry.

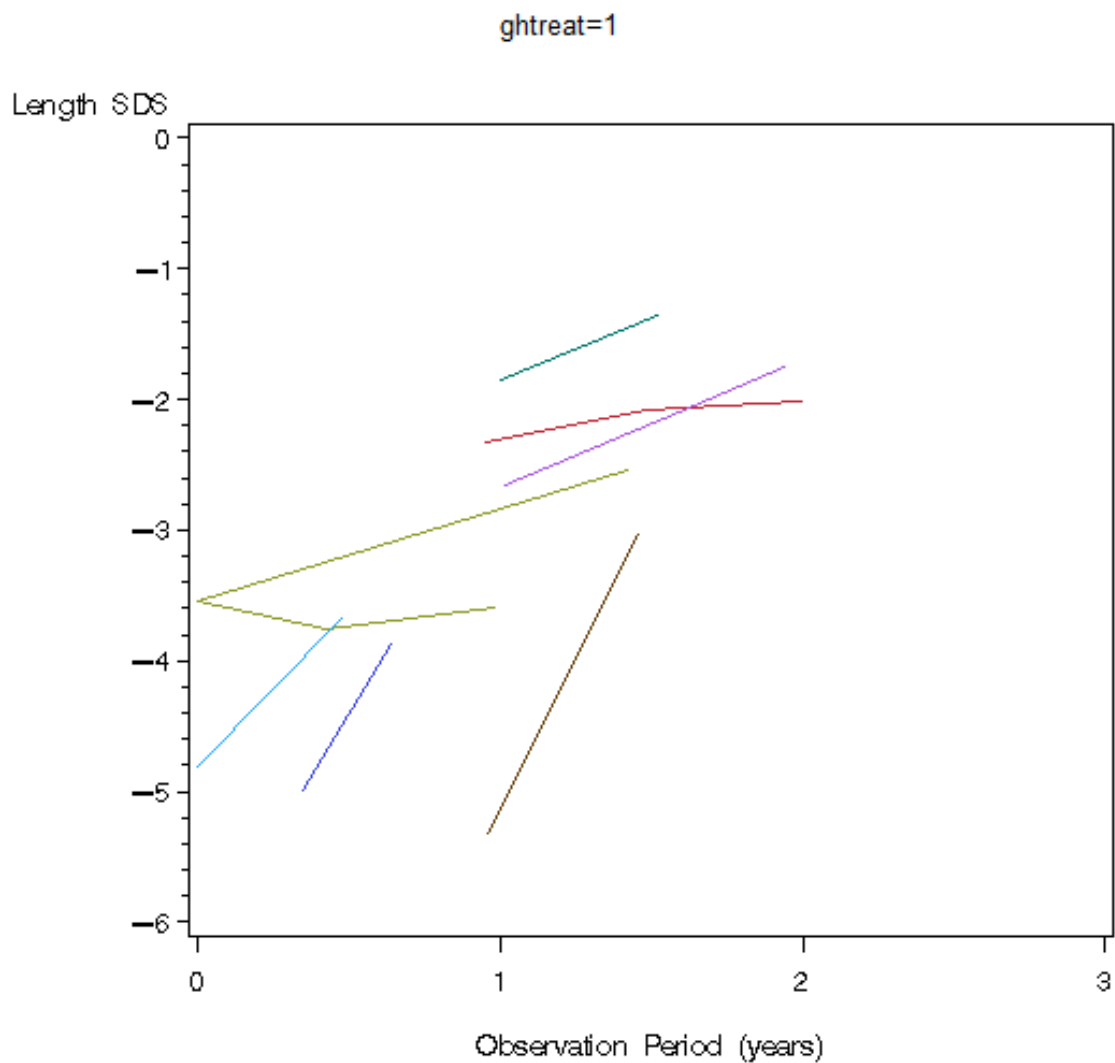

Supplement: supp_ASN.2010020192_Online-Appendix.pdf [file supp_ASN.2010020192_Online-Appendix.pdf]
